# Supplementary material for: Eggshell and environmental bacteria contribute to the intestinal microbiota of growing chickens
Source: PubMed Central journal article supplement (PMC7288515; doi:10.1186/s40104-020-00459-w), 2020-06-11

| Conv_Abund | Egg_Abund | Env_Abund |  |  | Conv_Abund | Egg_Abund | Env_Abund |
|------------|-----------|-----------|--|--|------------|-----------|-----------|
|------------|-----------|-----------|--|--|------------|-----------|-----------|

**Highly abundant ASVs (>1.0% in at least one input group) shared between T1 and T2 birds across all samples**

| T1 bird ASV abundances |        |       | ASV and Taxonomy                                    | T2 bird ASV abundances |        |        |
|------------------------|--------|-------|-----------------------------------------------------|------------------------|--------|--------|
| 8.929                  | 36.467 | 7.759 | ASV_1_Enterococcaceae_Enterococcus                  | 16.175                 | 38.578 | 8.062  |
| 5.656                  | 0.607  | 16.78 | ASV_2_Peptostreptococcaceae_Romboutsia              | 1.154                  | 4.757  | 22.177 |
| 33.583                 | 2.781  | 3.156 | ASV_3_Lachnospiraceae_NA                            | 17.431                 | 0.555  | 2.506  |
| 12.287                 | 14.322 | 2.235 | ASV_4_Lachnospiraceae_NA                            | 12.351                 | 1.056  | 0.812  |
| 0.015                  | 0.024  | 9.046 | ASV_5_Clostridiaceae_1_Clostridium_sensu_stricto_1  | 3.426                  | 7.934  | 1.965  |
| 2.351                  | 0.284  | 2.232 | ASV_6_Enterobacteriaceae_Escherichia/Shigella       | 9.603                  | 9.132  | 2.716  |
| 7.925                  | 0.089  | 0.906 | ASV_7_Lachnospiraceae_NA                            | 5.558                  | 0.193  | 0.061  |
| 1.38                   | 2.543  | 1.315 | ASV_8_Lachnospiraceae_NA                            | 0.587                  | 3.566  | 1.427  |
| 1.443                  | 0.004  | 0.048 | ASV_9_Enterococcaceae_Enterococcus                  | 0.912                  | 4.636  | 0.068  |
| 0.947                  | 4.21   | 1.106 | ASV_10_Enterobacteriaceae_Klebsiella                | 0.528                  | 0.031  | 4.774  |
| 1.164                  | 0.503  | 2.322 | ASV_11_Clostridiaceae_1_Clostridium_sensu_stricto_1 | 0.303                  | 0.105  | 5.946  |
| 0.647                  | 2.103  | 0.154 | ASV_12_Enterococcaceae_Enterococcus                 | 3.507                  | 0.587  | 0.612  |
| 0.107                  | 0.002  | 5.544 | ASV_13_Erysipelotrichaceae_Turicibacter             | 0.002                  | 0.002  | 1.686  |
| 0.495                  | 4.461  | 0.318 | ASV_14_Lachnospiraceae_NA                           | 0.233                  | 1.166  | 0.212  |
| 1.985                  | 0.217  | 0.373 | ASV_16_Ruminococcaceae_Flavonifractor               | 2.366                  | 0.066  | 0.905  |
| 0.013                  | 0.803  | 1.889 | ASV_19_Lachnospiraceae_NA                           | 0.074                  | 0.184  | 2.605  |
| 1.093                  | 0.15   | 1.064 | ASV_21_Lachnospiraceae_NA                           | 1.266                  | 0.091  | 0.062  |
| 0.684                  | 0.005  | 1.683 | ASV_26_Peptostreptococcaceae_Terrisporobacter       | 0.004                  | 0.001  | 2.435  |
| 2.196                  | 0.018  | 0.205 | ASV_30_Lachnospiraceae_NA                           | 1.505                  | 0.027  | 0.016  |

**Highly abundant ASVs (>1.0% in at least one input group) exclusive to either T1 or T2 birds across all samples**

| ASVs exclusive to T1 birds and abundances |       |       |                                            | ASVs exclusive to T2 birds and abundances           |       |       |       |
|-------------------------------------------|-------|-------|--------------------------------------------|-----------------------------------------------------|-------|-------|-------|
| 0.661                                     | 4.575 | 0.253 | ASV_17_Lachnospiraceae_Fusicatenibacter    | ASV_15_Lachnospiraceae_NA                           | 0.283 | 1.598 | 3.559 |
| 0.71                                      | 0.055 | 1.2   | ASV_23_Peptostreptococcaceae_Romboutsia    | ASV_20_Lachnospiraceae_Eisenbergiella               | 0.495 | 1.544 | 0.647 |
| 0.082                                     | 1.9   | 0.425 | ASV_25_Ruminococcaceae_Ruminiclostridium_9 | ASV_22_Lachnospiraceae_Lachnoclostridium            | 1.582 | 0.058 | 0.544 |
| 0                                         | NA    | 3.298 | ASV_31_Ruminococcaceae_Subdoligranulum     | ASV_24_Bacillaceae_NA                               | 0.092 | 1.007 | 0.42  |
| 0                                         | 0.001 | 1.72  | ASV_34_Ruminococcaceae_Ruminiclostridium_5 | ASV_27_Lachnospiraceae_Blautia                      | 1.202 | 0.064 | 0.473 |
| 0.076                                     | 2.987 | 0.001 | ASV_35_Enterococcaceae_Enterococcus        | ASV_28_Lachnospiraceae_NA                           | 0.421 | 1.472 | 0.677 |
| 2.423                                     | 0.046 | 0.001 | ASV_41_Lachnospiraceae_Sellimonas          | ASV_29_Lachnospiraceae_NA                           | 0.085 | 0.377 | 3.052 |
| 0.03                                      | 2.547 | 0     | ASV_42_Enterococcaceae_Enterococcus        | ASV_36_Lachnospiraceae_NA                           | 0.148 | 1.039 | 0.602 |
| 0.456                                     | 0.033 | 1.36  | ASV_44_Peptostreptococcaceae_Romboutsia    | ASV_38_Lachnospiraceae_Sellimonas                   | 0.04  | 0.028 | 2.844 |
| 0.199                                     | 1.334 | 0.001 | ASV_52_Lachnospiraceae_NA                  | ASV_39_Lachnospiraceae_NA                           | 1.895 | 0.118 | 0.025 |
| 0.285                                     | 1.335 | 0.003 | ASV_55_Lachnospiraceae_NA                  | ASV_40_Lachnospiraceae_Sellimonas                   | 0.027 | 0.006 | 1.216 |
|                                           |       |       |                                            | ASV_45_Peptostreptococcaceae_Romboutsia             | 0.02  | 0.219 | 1.128 |
|                                           |       |       |                                            | ASV_70_Clostridiaceae_1_Clostridium_sensu_stricto_1 | 0.038 | 0.043 | 1.136 |

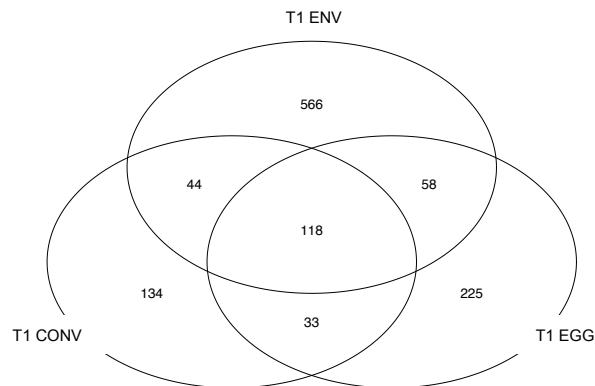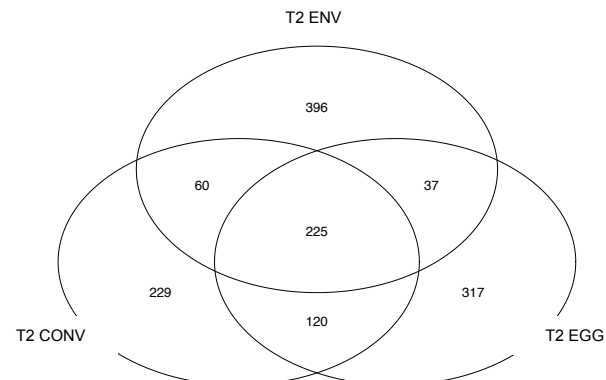

Supplement: 40104_2020_459_MOESM14_ESM.pdf [file 40104_2020_459_MOESM14_ESM.pdf]
