# Supplementary material for: Eggshell and environmental bacteria contribute to the intestinal microbiota of growing chickens
Source: PubMed Central journal article supplement (PMC7288515; doi:10.1186/s40104-020-00459-w), 2020-06-11
Supplement: 40104_2020_459_MOESM1_ESM.pdf [file 40104_2020_459_MOESM1_ESM.pdf]

| Timepoint   | Day  | -21 (Eggs begin incubation) | -14           | -7            | 0 (Hatch)                                                                  | 7                                                      | 14          | 21                      | 28          | 35          | 42                     |
|-------------|------|-----------------------------|---------------|---------------|----------------------------------------------------------------------------|--------------------------------------------------------|-------------|-------------------------|-------------|-------------|------------------------|
| T1 Sampling | CONV | 7 eggs (swab)               | 7 eggs (swab) | 7 eggs (swab) | 7 eggs (swab)<br>30 birds hatch<br>(10 legband)                            | 9 Necro<br>(10 Fecals)                                 | (10 Fecals) | 10 Necro<br>(10 Fecals) | (10 Fecals) | (10 Fecals) | 11 Necro               |
|             | EGG  | -                           | -             | -             | 15 birds hatch<br>(5 legband)                                              | 5 Necro<br>(10 Fecal)                                  | (5 Fecal)   | 5 Necro<br>(10 Fecals)  | (5 Fecals)  | (5 Fecals)  | 5 Necro<br>(5 Fecals)  |
|             | ENV  | -                           | -             | -             | 36 birds hatch<br>(12 legband)                                             | 12 Necro<br>(12 Fecal)                                 | (12 Fecal)  | 12 Necro<br>(12 Fecal)  | (12 Fecal)  | (12 Fecal)  | 12 Necro<br>(12 Fecal) |
| T2 Sampling | CONV | 5 eggs (wash)               | 5 eggs (wash) | 5 eggs (wash) | 10 eggs (wash: 5 pre-hatch/5 post-hatch)<br>36 birds hatch<br>(12 legband) | 12 Necro<br>(12 Fecal)                                 | (12 Fecal)  | 12 Necro<br>(12 Fecal)  | (12 Fecal)  | (12 Fecal)  | 12 Necro<br>(12 Fecal) |
|             | EGG  | -                           | -             | -             | 51 birds hatch                                                             | 13 Necro<br>14 Birds Cecal Contents Only<br>(12 Fecal) | (12 Fecal)  | 12 Necro<br>(12 Fecal)  | (12 Fecal)  | (12 Fecal)  | 12 Necro<br>(12 Fecal) |
|             | ENV  | -                           | -             | -             | 35 birds hatch                                                             | 12 Necro<br>(12 Fecal)                                 | (12 Fecal)  | 11 Necro<br>(12 Fecal)  | (12 Fecal)  | (12 Fecal)  | 12 Necro<br>(12 Fecal) |
