# Supplementary material for: Eggshell and environmental bacteria contribute to the intestinal microbiota of growing chickens
Source: PubMed Central journal article supplement (PMC7288515; doi:10.1186/s40104-020-00459-w), 2020-06-11
Supplement: 40104_2020_459_MOESM2_ESM.pdf [file 40104_2020_459_MOESM2_ESM.pdf]

| T2 Eggshell-Specific ASVs (Mean Abundance)          |      | Shared Eggshell ASVs<br>(T2 Abundance/T1 Abundance) |      |       | T1 Eggshell-Specific ASVs (Mean Abundance)           |      |
|-----------------------------------------------------|------|-----------------------------------------------------|------|-------|------------------------------------------------------|------|
| ASV_181_Enterococcaceae_Enterococcus                | 3.53 | ASV_103_Lactobacillaceae_Lactobacillus              | 7.29 | 1.16  | ASV_24_Bacillaceae_NA                                | 2.50 |
| ASV_167_Streptococcaceae_Streptococcus              | 3.31 | ASV_2_Peptostreptococcaceae_Romboutsia              | 5.42 | 3.27  | ASV_10_Enterobacteriaceae_Klebsiella                 | 1.82 |
| ASV_265_Lactobacillaceae_Lactobacillus              | 1.47 | ASV_127_Lactobacillaceae_Lactobacillus              | 5.00 | 0.48  | ASV_86_Lachnospiraceae_NA                            | 1.47 |
| ASV_176_Corynebacteriaceae_Corynebacterium_1        | 1.32 | ASV_6_Enterobacteriaceae_Escherichia/Shigella       | 4.75 | 10.33 | ASV_270_Lactobacillaceae_Lactobacillus               | 1.44 |
| ASV_304_Staphylococcaceae_Staphylococcus            | 1.12 | ASV_125_Lactobacillaceae_Lactobacillus              | 3.56 | 3.21  | ASV_133_Clostridiaceae_1_Clostridium_sensu_stricto_1 | 1.35 |
| ASV_199_Bacteroidaceae_Bacteroides                  | 1.09 | ASV_175_Lactobacillaceae_Lactobacillus              | 3.04 | 0.58  | ASV_186_Veillonellaceae_Megamonas                    | 0.68 |
| ASV_340_Prevotellaceae_Prevotellaceae_Ga6A1_group   | 0.92 | ASV_160_Lactobacillaceae_Lactobacillus              | 3.00 | 0.91  | ASV_112_Ruminococcaceae_Pseudoflavonifractor         | 0.50 |
| ASV_349_Fusobacteriaceae_Fusobacterium              | 0.89 | ASV_165_Veillonellaceae_Megamonas                   | 2.32 | 0.41  | ASV_493_Lactobacillaceae_Lactobacillus               | 0.49 |
| ASV_247_Bacteroidaceae_Bacteroides                  | 0.76 | ASV_8_Lachnospiraceae_NA                            | 1.67 | 1.94  | ASV_163_Ruminococcaceae_Ruminiclostridium_9          | 0.46 |
| ASV_331_Atopobiaceae_Olsenella                      | 0.71 | ASV_151_Veillonellaceae_Megamonas                   | 1.59 | 4.30  | ASV_444_Helicobacteraceae_Helicobacter               | 0.45 |
| ASV_365_Lactobacillaceae_Lactobacillus              | 0.68 | ASV_184_Veillonellaceae_Megamonas                   | 1.48 | 0.47  | ASV_539_Deinococcaceae_Deinococcus                   | 0.44 |
| ASV_369_Staphylococcaceae_Jeotgaliococcus           | 0.66 | ASV_166_Acidaminococcaceae_Phascolarctobacterium    | 1.24 | 1.21  | ASV_388_Pseudomonadaceae_Pseudomonas                 | 0.42 |
| ASV_362_Aerococcaceae_Aerococcus                    | 0.64 | ASV_207_Lactobacillaceae_Lactobacillus              | 1.06 | 1.73  | ASV_339_Bacteroidaceae_Bacteroides                   | 0.40 |
| ASV_317_Bacteroidaceae_Bacteroides                  | 0.64 | ASV_301_Lactobacillaceae_Lactobacillus              | 0.93 | 0.21  | ASV_84_Moraxellaceae_Acinetobacter                   | 0.40 |
| ASV_364_Aerococcaceae_Facklamia                     | 0.62 | ASV_1_Enterococcaceae_Enterococcus                  | 0.91 | 1.75  | ASV_20_Lachnospiraceae_Eisenbergiella                | 0.40 |
| ASV_358_Actinomycetaceae_Actinomyces                | 0.59 | ASV_323_Lactobacillaceae_Lactobacillus              | 0.85 | 0.26  | ASV_262_Bacteroidaceae_Bacteroides                   | 0.39 |
| ASV_381_Lactobacillaceae_Lactobacillus              | 0.57 | ASV_298_Lactobacillaceae_Lactobacillus              | 0.74 | 0.51  | ASV_303_Prevotellaceae_Alloprevotella                | 0.38 |
| ASV_334_Bacteroidaceae_Bacteroides                  | 0.45 | ASV_94_Ruminococcaceae_Faecalibacterium             | 0.68 | 0.54  | ASV_600_Family_XI_Murdochella                        | 0.34 |
| ASV_391_Bacteroidaceae_Bacteroides                  | 0.42 | ASV_150_Corynebacteriaceae_Corynebacterium_1        | 0.63 | 1.14  | ASV_574_Family_XI_Peptoniphilus                      | 0.32 |
| ASV_449_Staphylococcaceae_Jeotgaliococcus           | 0.39 | ASV_237_Bacteroidaceae_Bacteroides                  | 0.63 | 1.08  | ASV_537_Family_XI_Gallicola                          | 0.31 |
| ASV_28_Lachnospiraceae_NA                           | 0.37 | ASV_208_Bacteroidaceae_Bacteroides                  | 0.61 | 2.53  | ASV_195_Xanthomonadaceae_Stenotrophomonas            | 0.30 |
| ASV_471_Corynebacteriaceae_Corynebacterium_1        | 0.33 | ASV_200_Lachnospiraceae_NA                          | 0.53 | 0.15  | ASV_98_Erysipelotrichaceae_Erysipelatoclostridium    | 0.29 |
| ASV_437_Rikenellaceae_NA                            | 0.33 | ASV_264_Atopobiaceae_Olsenella                      | 0.48 | 0.83  | ASV_512_Deferribacteraceae_Mucispirillum             | 0.27 |
| ASV_502_Moraxellaceae_Psychrobacter                 | 0.31 | ASV_11_Clostridiaceae_1_Clostridium_sensu_stricto_1 | 0.48 | 0.42  | ASV_62_Lachnospiraceae_Shuttleworthia                | 0.27 |
| ASV_345_Prevotellaceae_Prevotellaceae_UCG-001       | 0.31 | ASV_33_Lachnospiraceae_NA                           | 0.41 | 0.55  | ASV_427_Prevotellaceae_Prevotellaceae_UCG-001        | 0.27 |
| ASV_335_Bacteroidaceae_Bacteroides                  | 0.29 | ASV_135_Ruminococcaceae_Faecalibacterium            | 0.40 | 0.81  | ASV_622_Prevotellaceae_Prevotellaceae_UCG-001        | 0.26 |
| ASV_408_Rikenellaceae_Rikenellaceae_RC9_gut_group   | 0.28 | ASV_238_Veillonellaceae_Megasphaera                 | 0.38 | 0.15  | ASV_32_Lachnospiraceae_NA                            | 0.25 |
| ASV_214_Ruminococcaceae_Flavonifractor              | 0.26 | ASV_232_Lachnospiraceae_Blautia                     | 0.37 | 0.14  | ASV_548_Bifidobacteriaceae_Aeriscardovia             | 0.21 |
| ASV_485_Bacteroidaceae_Bacteroides                  | 0.25 | ASV_261_Bacteroidaceae_Bacteroides                  | 0.35 | 0.37  | ASV_740_Prevotellaceae_Prevotellaceae_UCG-001        | 0.20 |
| ASV_252_Prevotellaceae_Prevotellaceae_UCG-001       | 0.23 | ASV_81_Lachnospiraceae_CHKCI001                     | 0.31 | 0.27  | ASV_144_Peptostreptococcaceae_Romboutsia             | 0.20 |
| ASV_3_Lachnospiraceae_NA                            | 0.23 | ASV_277_Bacteroidaceae_Bacteroides                  | 0.30 | 1.15  | ASV_473_Bacteroidaceae_Bacteroides                   | 0.19 |
| ASV_530_Enterococcaceae_NA                          | 0.22 | ASV_65_Lachnospiraceae_Sellimonas                   | 0.29 | 0.83  | ASV_85_Staphylococcaceae_Staphylococcus              | 0.19 |
| ASV_612_Bacteroidaceae_Bacteroides                  | 0.21 | ASV_13_Erysipelotrichaceae_Turcibacter              | 0.29 | 0.91  | ASV_385_Lachnospiraceae_NA                           | 0.18 |
| ASV_505_Lactobacillaceae_Lactobacillus              | 0.21 | ASV_4_Lachnospiraceae_NA                            | 0.27 | 2.74  | ASV_183_Erysipelotrichaceae_Erysipelatoclostridium   | 0.18 |
| ASV_70_Clostridiaceae_1_Clostridium_sensu_stricto_1 | 0.20 | ASV_139_Bacillaceae_Bacillus                        | 0.26 | 0.47  | ASV_791_Moraxellaceae_Enhydrobacter                  | 0.17 |
| ASV_691_Bacteroidaceae_Bacteroides                  | 0.20 | ASV_382_Desulfovibrionaceae_Desulfovibrio           | 0.24 | 0.45  | ASV_654_Muribaculaceae_NA                            | 0.15 |
| ASV_450_Bacteroidaceae_Bacteroides                  | 0.19 | ASV_19_Lachnospiraceae_NA                           | 0.24 | 1.06  | ASV_209_Lachnospiraceae_NA                           | 0.15 |
| ASV_601_Aeromonadaceae_Oceanisphaera                | 0.17 | ASV_410_Tannerellaceae_Parabacteroides              | 0.22 | 0.17  | ASV_795_Rhizobiaceae_NA                              | 0.15 |
| ASV_31_Ruminococcaceae_Subdoligranulum              | 0.17 | ASV_443_Peptococcaceae_Peptococcus                  | 0.22 | 0.14  | ASV_352_Lachnospiraceae_Sellimonas                   | 0.14 |
| ASV_38_Lachnospiraceae_Sellimonas                   | 0.14 | ASV_36_Lachnospiraceae_NA                           | 0.22 | 2.00  | ASV_718_Lactobacillaceae_Lactobacillus               | 0.14 |
| ASV_555_Lactobacillaceae_Lactobacillus              | 0.14 | ASV_23_Peptostreptococcaceae_Romboutsia             | 0.22 | 0.10  | ASV_586_Ruminococcaceae_Subdoligranulum              | 0.14 |
| ASV_616_Ruminococcaceae_Ruminococcaceae_UCG-005     | 0.14 | ASV_114_Lachnospiraceae_Anaerosporebacter           | 0.20 | 2.22  | ASV_300_Staphylococcaceae_Staphylococcus             | 0.14 |
| ASV_571_Ruminococcaceae_Ruminococcaceae_UCG-007     | 0.13 | ASV_122_Lachnospiraceae_NA                          | 0.20 | 0.13  | ASV_866_Micrococcaceae_Rothia                        | 0.14 |
| ASV_723_Muribaculaceae_NA                           | 0.13 | ASV_368_Veillonellaceae_Megamonas                   | 0.20 | 0.36  | ASV_615_Ruminococcaceae_Fournierella                 | 0.14 |
| ASV_377_Marinifilaceae_Odoribacter                  | 0.13 | ASV_383_Bifidobacteriaceae_Bifidobacterium          | 0.16 | 0.41  | ASV_544_Coriobacteriaceae_Enorma                     | 0.13 |
| ASV_671_Carnobacteriaceae_Atopostipes               | 0.13 | ASV_14_Lachnospiraceae_NA                           | 0.16 | 1.18  | ASV_547_Chitinophagaceae_Hydrotalea                  | 0.13 |
| ASV_542_Prevotellaceae_NA                           | 0.13 | ASV_110_Lachnospiraceae_Sellimonas                  | 0.15 | 0.94  | ASV_963_Muribaculaceae_NA                            | 0.12 |
| ASV_746_Bacteroidaceae_Bacteroides                  | 0.13 | ASV_318_Prevotellaceae_Prevotellaceae_UCG-001       | 0.15 | 0.57  | ASV_152_Ruminococcaceae_NA                           | 0.12 |
| ASV_210_Lachnospiraceae_Lachnoclostridium           | 0.12 | ASV_243_Muribaculaceae_NA                           | 0.12 | 0.34  | ASV_40_Lachnospiraceae_Sellimonas                    | 0.12 |
| ASV_628_Bacteroidaceae_Bacteroides                  | 0.12 | ASV_540_Lactobacillaceae_Lactobacillus              | 0.12 | 0.25  | ASV_68_Staphylococcaceae_Staphylococcus              | 0.11 |
| ASV_635_Bacteroidaceae_Bacteroides                  | 0.12 | ASV_617_Prevotellaceae_Alloprevotella               | 0.11 | 0.26  |                                                      |      |
| ASV_136_Lachnospiraceae_NA                          | 0.12 | ASV_607_Ruminococcaceae_NA                          | 0.10 | 0.17  |                                                      |      |
| ASV_430_Ruminococcaceae_Ruminococcaceae_UCG-008     | 0.12 | ASV_142_Lachnospiraceae_CAG-56                      | 0.10 | 0.71  |                                                      |      |
| ASV_722_Prevotellaceae_Prevotellaceae_Ga6A1_group   | 0.11 | ASV_43_Ruminococcaceae_Butyricoccus                 | 0.10 | 0.53  |                                                      |      |
| ASV_380_Synergistaceae_Synergistes                  | 0.11 | ASV_61_Erysipelotrichaceae_Erysipelatoclostridium   | 0.10 | 0.44  |                                                      |      |
| ASV_869_Aeromonadaceae_Oceanisphaera                | 0.11 |                                                     |      |       |                                                      |      |
| ASV_694_Micrococcaceae_Yaniella                     | 0.10 |                                                     |      |       |                                                      |      |
| ASV_719_Ruminococcaceae_Subdoligranulum             | 0.10 |                                                     |      |       |                                                      |      |
| ASV_155_Peptostreptococcaceae_Romboutsia            | 0.10 |                                                     |      |       |                                                      |      |
