# Supplementary material for: Eggshell and environmental bacteria contribute to the intestinal microbiota of growing chickens
Source: PubMed Central journal article supplement (PMC7288515; doi:10.1186/s40104-020-00459-w), 2020-06-11

Fecal Swab Microbiota: Phylum &gt; 1%

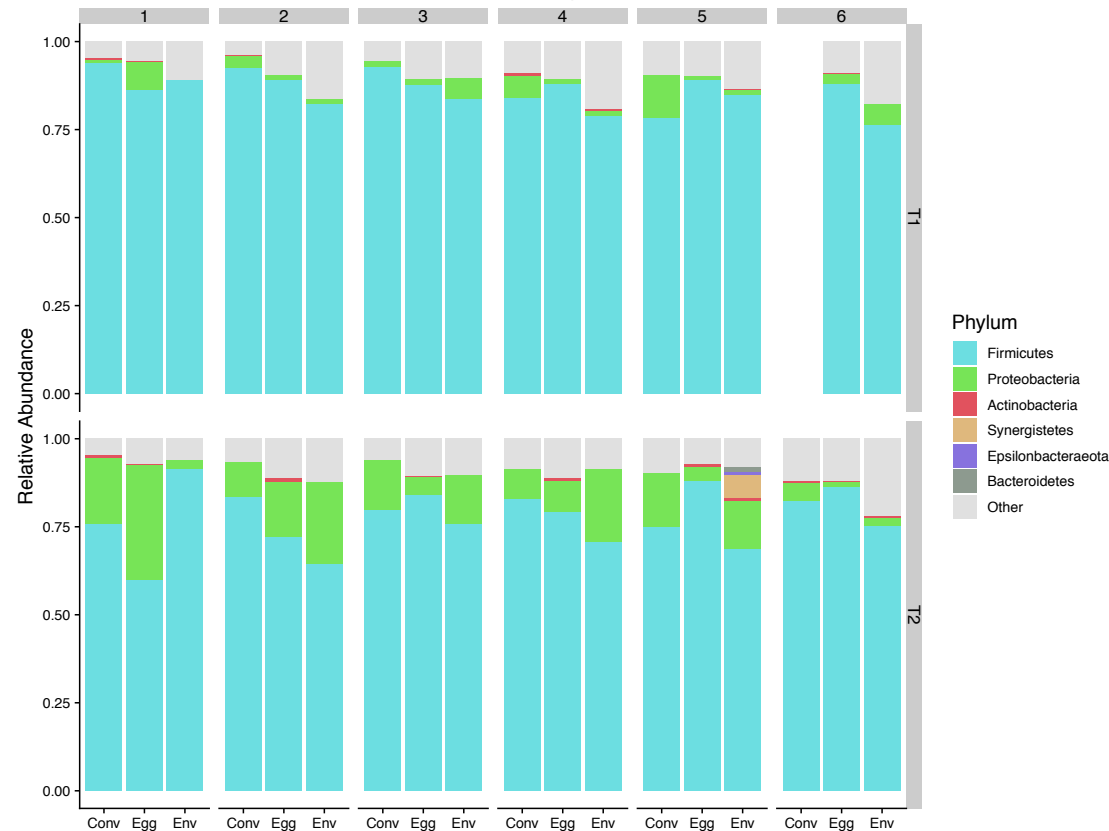

Fecal Swab Microbiota: Genus &gt; 2%

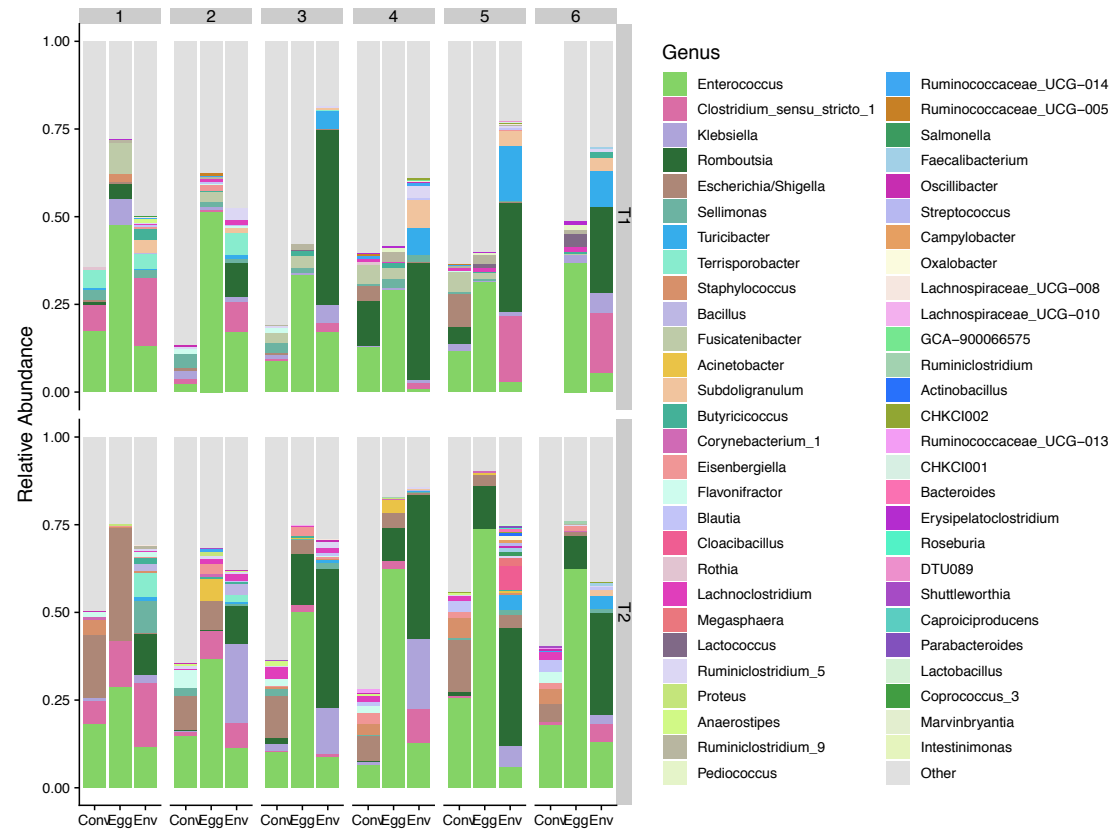

Supplement: 40104_2020_459_MOESM7_ESM.pdf [file 40104_2020_459_MOESM7_ESM.pdf]
